# Supplementary material
Source: Research Square preprint supplement (doi:10.21203/rs.3.rs-8894614/v1)
Supplement: Supplementary file 1 [file d4d10b888af130b165c3ae72.xlsx]

## Sheet: Ertugliflozin
drug	drugname	prod_ai	Count
Ertugliflozin	metformin	metformin hydrochloride	97
Ertugliflozin	atorvastatin	atorvastatin	22
Ertugliflozin	lisinopril.	lisinopril	19
Ertugliflozin	insulin	insulin nos	19
Ertugliflozin	metformin hydrochloride	metformin hydrochloride	18
Ertugliflozin	januvia	sitagliptin phosphate	15
Ertugliflozin	aspirin.	aspirin	15
Ertugliflozin	lantus	insulin glargine	10
Ertugliflozin	glipizide.	glipizide	10
Ertugliflozin	insulin glargine	insulin glargine	9
Ertugliflozin	metoprolol.	metoprolol	8
Ertugliflozin	semaglutide	semaglutide	8
Ertugliflozin	metformin hydrochloride\sitagliptin phosphate	metformin hydrochloride\sitagliptin phosphate	8
Ertugliflozin	lipitor	atorvastatin calcium	7
Ertugliflozin	victoza	liraglutide	7
Ertugliflozin	amlodipine	amlodipine besylate	7
Ertugliflozin	losartan.	losartan	7
Ertugliflozin	glimepiride.	glimepiride	7
Ertugliflozin	aspirin	aspirin	7
Ertugliflozin	plavix	clopidogrel bisulfate	6
Ertugliflozin	hydrochlorothiazide.	hydrochlorothiazide	6
Ertugliflozin	humalog	insulin lispro	6
Ertugliflozin	insulin nos	insulin nos	6
Ertugliflozin	janumet	metformin hydrochloride\sitagliptin phosphate	5
Ertugliflozin	simvastatin.	simvastatin	5
Ertugliflozin	clopidogrel	clopidogrel bisulfate	5
Ertugliflozin	rosuvastatin.	rosuvastatin	5
Ertugliflozin	tresiba	insulin degludec	5
Ertugliflozin	sitagliptin	sitagliptin	5
Ertugliflozin	trulicity	dulaglutide	5
Ertugliflozin	linagliptin	linagliptin	5
Ertugliflozin	pioglitazone.	pioglitazone	4
Ertugliflozin	finasteride.	finasteride	4
Ertugliflozin	cymbalta	duloxetine hydrochloride	4
Ertugliflozin	amiodarone	amiodarone	4
Ertugliflozin	crestor	rosuvastatin calcium	4
Ertugliflozin	ozempic	semaglutide	4
Ertugliflozin	spironolactone.	spironolactone	4
Ertugliflozin	gabapentin.	gabapentin	4
Ertugliflozin	prinivil	lisinopril	4
Ertugliflozin	glimepiride	glimepiride	4
Ertugliflozin	acarbose	acarbose	4
Ertugliflozin	metoprolol succinate	metoprolol succinate	4
Ertugliflozin	bisoprolol	bisoprolol	4
Ertugliflozin	cholecalciferol	cholecalciferol	3
Ertugliflozin	polocard	aspirin	3
Ertugliflozin	novolog	insulin aspart	3
Ertugliflozin	concor	bisoprolol fumarate	3
Ertugliflozin	siofor	metformin hydrochloride	3
Ertugliflozin	verapamil	verapamil hydrochloride	3
Ertugliflozin	multivitamin	vitamins	3
Ertugliflozin	norvasc	amlodipine besylate	3
Ertugliflozin	basaglar	insulin glargine	3
Ertugliflozin	fenofibrate.	fenofibrate	3
Ertugliflozin	levothyroxine sodium.	levothyroxine sodium	3
Ertugliflozin	zocor	simvastatin	3
Ertugliflozin	levemir	insulin detemir	3
Ertugliflozin	lasix	furosemide	3
Ertugliflozin	amaryl	glimepiride	3
Ertugliflozin	lercanidipine	lercanidipine	3
Ertugliflozin	fenofibrate	fenofibrate	3
Ertugliflozin	metoprolol	metoprolol	3
Ertugliflozin	febuxostat	febuxostat	3
Ertugliflozin	rosuvastatin calcium	rosuvastatin calcium	3
Ertugliflozin	voglibose	voglibose	3
Ertugliflozin	metformin hydrochloride\saxagliptin	metformin hydrochloride\saxagliptin	3
Ertugliflozin	rosiglitazone hydrochloride	rosiglitazone hydrochloride	3
Ertugliflozin	atorvastatin calcium	atorvastatin calcium	3
Ertugliflozin	simvastatin	simvastatin	3
Ertugliflozin	insulin aspart\insulin degludec	insulin aspart\insulin degludec	3
Ertugliflozin	dapagliflozin.	dapagliflozin	2
Ertugliflozin	amlozek	amlodipine besylate	2
Ertugliflozin	carvedilol.	carvedilol	2
Ertugliflozin	espiro	espiro	2
Ertugliflozin	piramil	ramipril	2
Ertugliflozin	roswera	rosuvastatin	2
Ertugliflozin	ramipril.	ramipril	2
Ertugliflozin	tamsulosin hydrochloride.	tamsulosin hydrochloride	2
Ertugliflozin	pravastatin.	pravastatin	2
Ertugliflozin	synthroid	levothyroxine sodium	2
Ertugliflozin	glucophage	metformin hydrochloride	2
Ertugliflozin	toujeo	insulin glargine	2
Ertugliflozin	tritace	ramipril	2
Ertugliflozin	cyanocobalamin.	cyanocobalamin	2
Ertugliflozin	vitamin c	ascorbic acid	2
Ertugliflozin	farxiga	dapagliflozin propanediol	2
Ertugliflozin	losartan potassium.	losartan potassium	2
Ertugliflozin	insulin lispro	insulin lispro	2
Ertugliflozin	gemfibrozil.	gemfibrozil	2
Ertugliflozin	eliquis	apixaban	2
Ertugliflozin	montelukast	montelukast sodium	2
Ertugliflozin	vitamin d (unspecified)	vitamin d nos	2
Ertugliflozin	glyburide.	glyburide	2
Ertugliflozin	ambien	zolpidem tartrate	2
Ertugliflozin	pantoprazole	pantoprazole	2
Ertugliflozin	insulin aspart	insulin aspart	2
Ertugliflozin	metformin hydrochloride.	metformin hydrochloride	2
Ertugliflozin	prilosec	omeprazole magnesium	2
Ertugliflozin	tenaxum	rilmenidine	2
Ertugliflozin	omeprazole.	omeprazole	2
Ertugliflozin	vitamin d3	cholecalciferol	2
Ertugliflozin	zyrtec	cetirizine hydrochloride	2
Ertugliflozin	melatonin	melatonin	2
Ertugliflozin	fish oil	fish oil	2
Ertugliflozin	dulaglutide.	dulaglutide	2
Ertugliflozin	glipizide	glipizide	2
Ertugliflozin	gabapentin	gabapentin	2
Ertugliflozin	fluoxetine	fluoxetine hydrochloride	2
Ertugliflozin	gliclazide	gliclazide	2
Ertugliflozin	hydrochlorothiazide	hydrochlorothiazide	2
Ertugliflozin	dulaglutide	dulaglutide	2
Ertugliflozin	metoprolol tartrate	metoprolol tartrate	2
Ertugliflozin	ramipril	ramipril	2
Ertugliflozin	levothyroxine sodium	levothyroxine sodium	2
Ertugliflozin	hydrochlorothiazide\olmesartan medoxomil	hydrochlorothiazide\olmesartan medoxomil	2
Ertugliflozin	amlodipine besylate	amlodipine besylate	2
Ertugliflozin	xue zhi kang	xue zhi kang	2
Ertugliflozin	glucobay	acarbose	2
Ertugliflozin	repaglinide	repaglinide	2
Ertugliflozin	acipimox	acipimox	2
Ertugliflozin	miglitol	miglitol	2
Ertugliflozin	calcium dobesilate	calcium dobesilate	2
Ertugliflozin	benzbromarone	benzbromarone	2
Ertugliflozin	lansoprazole	lansoprazole	2
Ertugliflozin	lisinopril	lisinopril	2
Ertugliflozin	spironolactone	spironolactone	2
Ertugliflozin	bumetanide	bumetanide	2
Ertugliflozin	apixaban	apixaban	2
Ertugliflozin	dorzolamide and timolol	dorzolamide hydrochloride\timolol maleate	2
Ertugliflozin	hydrochlorothiazide (+) quinapril hydrochloride	hydrochlorothiazide (+) quinapril hydrochloride	1
Ertugliflozin	levomefolate calcium	levomefolate calcium	1
Ertugliflozin	saxagliptin	saxagliptin	1
Ertugliflozin	bydureon	exenatide	1
Ertugliflozin	losartan potassium tablets	losartan potassium	1
Ertugliflozin	valsacor	valsartan	1
Ertugliflozin	sobycor	bisoprolol fumarate	1
Ertugliflozin	tertensif sr	tertensif sr	1
Ertugliflozin	glibetic (glimepiride)	glibetic (glimepiride)	1
Ertugliflozin	metformax	metformin hydrochloride	1
Ertugliflozin	atoris	atorvastatin calcium	1
Ertugliflozin	omnic ocas	tamsulosin hydrochloride	1
Ertugliflozin	nevanac	nepafenac	1
Ertugliflozin	dicloabak	diclofenac sodium	1
Ertugliflozin	ethamsylate	ethamsylate	1
Ertugliflozin	galvenox	galvenox	1
Ertugliflozin	lacipil	lacidipine	1
Ertugliflozin	diuver	torsemide	1
Ertugliflozin	acard	aspirin	1
Ertugliflozin	doxanorm	doxanorm	1
Ertugliflozin	mixtard human 70/30	insulin human	1
Ertugliflozin	ipp (pantoprazole)	ipp (pantoprazole)	1
Ertugliflozin	furosemide.	furosemide	1
Ertugliflozin	sortis	atorvastatin	1
Ertugliflozin	novomix 50	insulin aspart	1
Ertugliflozin	lozap h	hydrochlorothiazide\losartan potassium	1
Ertugliflozin	nergolin	nergolin	1
Ertugliflozin	actrapid (insulin, neutral)	actrapid (insulin, neutral)	1
Ertugliflozin	hygroton	chlorthalidone	1
Ertugliflozin	controloc (pantoprazole)	controloc (pantoprazole)	1
Ertugliflozin	ketonal	ketoprofen	1
Ertugliflozin	insulatard (insulin human, isophane)	insulin human	1
Ertugliflozin	mononit	mononit	1
Ertugliflozin	xarelto	rivaroxaban	1
Ertugliflozin	advil pm	diphenhydramine citrate\ibuprofen	1
Ertugliflozin	miralax	polyethylene glycol 3350	1
Ertugliflozin	famvir	famciclovir	1
Ertugliflozin	ass 100	aspirin	1
Ertugliflozin	apidra	insulin glulisine	1
Ertugliflozin	betaloc zok	metoprolol succinate	1
Ertugliflozin	tertensif	indapamide	1
Ertugliflozin	alendronate sodium.	alendronate sodium	1
Ertugliflozin	benazepril hydrochloride.	benazepril hydrochloride	1
Ertugliflozin	dapsone.	dapsone	1
Ertugliflozin	isosorbide.	isosorbide	1
Ertugliflozin	ranitidine.	ranitidine	1
Ertugliflozin	paxil	paroxetine hydrochloride	1
Ertugliflozin	vitamin d	cholecalciferol	1
Ertugliflozin	pyridoxine	pyridoxine	1
Ertugliflozin	levothyroxine.	levothyroxine	1
Ertugliflozin	marcumar	phenprocoumon	1
Ertugliflozin	metohexal succ	metoprolol succinate	1
Ertugliflozin	torsemide.	torsemide	1
Ertugliflozin	amlodipine 10 mg	amlodipine besylate	1
Ertugliflozin	jardiance	empagliflozin	1
Ertugliflozin	losartin	losartan	1
Ertugliflozin	hyzaar	hydrochlorothiazide\losartan potassium	1
Ertugliflozin	metropolol	metoprolol	1
Ertugliflozin	janumet xr	metformin hydrochloride\sitagliptin phosphate	1
Ertugliflozin	labatelol	labatelol	1
Ertugliflozin	atenolol.	atenolol	1
Ertugliflozin	premarin	estrogens, conjugated	1
Ertugliflozin	amiodarone hydrochloride.	amiodarone hydrochloride	1
Ertugliflozin	metoprolol succinate.	metoprolol succinate	1
Ertugliflozin	allopurinol.	allopurinol	1
Ertugliflozin	diltiazem.	diltiazem	1
Ertugliflozin	prevacid	lansoprazole	1
Ertugliflozin	flomax	tamsulosin hydrochloride	1
Ertugliflozin	testosterone.	testosterone	1
Ertugliflozin	ceftin	cefuroxime axetil	1
Ertugliflozin	tylenol	acetaminophen	1
Ertugliflozin	dulera	formoterol fumarate dihydrate\mometasone furoate	1
Ertugliflozin	cetirizine hydrochloride.	cetirizine hydrochloride	1
Ertugliflozin	glucovance	glyburide\metformin hydrochloride	1
Ertugliflozin	soliqua 100/33	insulin glargine\lixisenatide	1
Ertugliflozin	fiasp	insulin aspart	1
Ertugliflozin	hydrochlorot	hydrochlorothiazide	1
Ertugliflozin	tramadol hydrochloride.	tramadol hydrochloride	1
Ertugliflozin	meloxicam.	meloxicam	1
Ertugliflozin	methocarbamol.	methocarbamol	1
Ertugliflozin	symbicort	budesonide\formoterol fumarate dihydrate	1
Ertugliflozin	berlthyrox	levothyroxine sodium	1
Ertugliflozin	olmesartan medoxomil.	olmesartan medoxomil	1
Ertugliflozin	pangrol	pancrelipase	1
Ertugliflozin	esomeprazole.	esomeprazole magnesium	1
Ertugliflozin	xultophy 100/3.6	insulin degludec\liraglutide	1
Ertugliflozin	saroten	amitriptyline	1
Ertugliflozin	novorapid	insulin aspart	1
Ertugliflozin	ezetrol	ezetimibe	1
Ertugliflozin	candesartan.	candesartan	1
Ertugliflozin	folic acid.	folic acid	1
Ertugliflozin	alfuzosin hydrochloride.	alfuzosin hydrochloride	1
Ertugliflozin	keppra	levetiracetam	1
Ertugliflozin	glipizide (+) metformin hydrochloride	glipizide\metformin hydrochloride	1
Ertugliflozin	sinopril	sinopril	1
Ertugliflozin	zolpidem	zolpidem tartrate	1
Ertugliflozin	sertraline	sertraline hydrochloride	1
Ertugliflozin	depo-provera	medroxyprogesterone acetate	1
Ertugliflozin	levocetirizine	levocetirizine	1
Ertugliflozin	hydrocodone-acetaminophen	acetaminophen\hydrocodone	1
Ertugliflozin	qvar	beclomethasone dipropionate	1
Ertugliflozin	albuterol.	albuterol	1
Ertugliflozin	troglitazone	troglitazone	1
Ertugliflozin	novomix 30	insulin aspart	1
Ertugliflozin	coversyl (perindopril arginine)	perindopril arginine	1
Ertugliflozin	minax	metoprolol	1
Ertugliflozin	solprin	aspirin	1
Ertugliflozin	noxicid	esomeprazole	1
Ertugliflozin	sertraline hydrochloride.	sertraline hydrochloride	1
Ertugliflozin	ephedrine.	ephedrine	1
Ertugliflozin	savlon (cetrimide (+) chlorhexidine gluconate)	savlon (cetrimide (+) chlorhexidine gluconate)	1
Ertugliflozin	humulin nos	insulin human	1
Ertugliflozin	warfarin	warfarin	1
Ertugliflozin	digoxin.	digoxin	1
Ertugliflozin	gensulin m50	gensulin m50	1
Ertugliflozin	gensulin m30	gensulin m30	1
Ertugliflozin	gensulin r	insulin human	1
Ertugliflozin	areplex	clopidogrel bisulfate	1
Ertugliflozin	beto zk	metoprolol succinate	1
Ertugliflozin	contix	contix	1
Ertugliflozin	euthyrox	levothyroxine sodium	1
Ertugliflozin	physiotens	moxonidine	1
Ertugliflozin	co amlessa	co amlessa	1
Ertugliflozin	metfodiab	metfodiab	1
Ertugliflozin	limeral	limeral	1
Ertugliflozin	corlentor	ivabradine hydrochloride	1
Ertugliflozin	furanthril (furosemide)	furanthril (furosemide)	1
Ertugliflozin	beloc-zok	metoprolol succinate	1
Ertugliflozin	diaprel	gliclazide	1
Ertugliflozin	thiogamma	.alpha.-lipoic acid	1
Ertugliflozin	lipex	lipex	1
Ertugliflozin	prazosin.	prazosin	1
Ertugliflozin	idaprex	perindopril erbumine	1
Ertugliflozin	famotidine 20 mg	famotidine	1
Ertugliflozin	ondansetron 4 mg	ondansetron	1
Ertugliflozin	cozaar	losartan potassium	1
Ertugliflozin	hydrocodone	hydrocodone	1
Ertugliflozin	coreg	carvedilol	1
Ertugliflozin	repatha	evolocumab	1
Ertugliflozin	n/a	unspecified ingredient	1
Ertugliflozin	zomarist	zomarist	1
Ertugliflozin	lamictal	lamotrigine	1
Ertugliflozin	flonase	fluticasone propionate	1
Ertugliflozin	magnesium glycinate	magnesium glycinate	1
Ertugliflozin	levodopa	levodopa	1
Ertugliflozin	restex	benserazide\levodopa	1
Ertugliflozin	nourianz	istradefylline	1
Ertugliflozin	alprazolam.	alprazolam	1
Ertugliflozin	carbidopa/levodopa	carbidopa\levodopa	1
Ertugliflozin	hydrocodone bitartrate and acetaminophen	acetaminophen\hydrocodone bitartrate	1
Ertugliflozin	lunesta	eszopiclone	1
Ertugliflozin	vitamin b1	thiamine hydrochloride	1
Ertugliflozin	zofran	ondansetron hydrochloride	1
Ertugliflozin	eylea	aflibercept	1
Ertugliflozin	glimeperide 4 mg bid	glimeperide 4 mg bid	1
Ertugliflozin	lisinopril 20 mg daily	lisinopril 20 mg daily	1
Ertugliflozin	metformin 1500 mg bid	metformin 1500 mg bid	1
Ertugliflozin	alogliptin.	alogliptin	1
Ertugliflozin	cytomel	liothyronine sodium	1
Ertugliflozin	viagra	sildenafil citrate	1
Ertugliflozin	glucotrol	glipizide	1
Ertugliflozin	omega?3 acids	omega-3 fatty acids	1
Ertugliflozin	famotidine.	famotidine	1
Ertugliflozin	rosuvastatin calcium.	rosuvastatin calcium	1
Ertugliflozin	dafiro	amlodipine\valsartan	1
Ertugliflozin	valsartan.	valsartan	1
Ertugliflozin	mesalazin	mesalamine	1
Ertugliflozin	oxycodone	oxycodone	1
Ertugliflozin	tizanidine.	tizanidine	1
Ertugliflozin	ondansetron	ondansetron	1
Ertugliflozin	iron	iron	1
Ertugliflozin	acetylsalicylic acid	acetylsalicylic acid	1
Ertugliflozin	buspirone	buspirone hydrochloride	1
Ertugliflozin	eszopiclone	eszopiclone	1
Ertugliflozin	oxcarbazepine	oxcarbazepine	1
Ertugliflozin	sucralfate	sucralfate	1
Ertugliflozin	tizanidine	tizanidine	1
Ertugliflozin	rosuvastatin	rosuvastatin	1
Ertugliflozin	azilsartan medoxomil;chlortalidone	azilsartan medoxomil;chlortalidone	1
Ertugliflozin	losartan	losartan	1
Ertugliflozin	nebivolol	nebivolol	1
Ertugliflozin	enalapril	enalapril	1
Ertugliflozin	cephalexin	cephalexin	1
Ertugliflozin	quetiapine	quetiapine	1
Ertugliflozin	clonazepam	clonazepam	1
Ertugliflozin	bupropion hydrochloride xl	bupropion hydrochloride	1
Ertugliflozin	nexium	esomeprazole magnesium	1
Ertugliflozin	pantoprazole sodium	pantoprazole sodium	1
Ertugliflozin	oleovit-d3	oleovit-d3	1
Ertugliflozin	neurobion forte [calcium pantothenate;cyanocobalamin;nicotinamide;pyri	neurobion forte [calcium pantothenate;cyanocobalamin;nicotinamide;pyri	1
Ertugliflozin	kcl retard slow k	kcl retard slow k	1
Ertugliflozin	magnesium carbonate\magnesium oxide	magnesium carbonate\magnesium oxide	1
Ertugliflozin	folic acid	folic acid	1
Ertugliflozin	inspra	eplerenone	1
Ertugliflozin	inderal	propranolol hydrochloride	1
Ertugliflozin	entresto	sacubitril\valsartan	1
Ertugliflozin	acetaminophen\caffeine\propyphenazone	acetaminophen\caffeine\propyphenazone	1
Ertugliflozin	neurontin	gabapentin	1
Ertugliflozin	sertraline hydrochloride	sertraline hydrochloride	1
Ertugliflozin	trazodone hydrochloride	trazodone hydrochloride	1
Ertugliflozin	lafene	lafene	1
Ertugliflozin	fenoterol hydrobromide\ipratropium bromide	fenoterol hydrobromide\ipratropium bromide	1
Ertugliflozin	amlodipine besylate\lisinopril	amlodipine besylate\lisinopril	1
Ertugliflozin	escitalopram	escitalopram oxalate	1
Ertugliflozin	metformin hydrochloride\vildagliptin	metformin hydrochloride\vildagliptin	1
Ertugliflozin	beta histina bluepharma	beta histina bluepharma	1
Ertugliflozin	trental	pentoxifylline	1
Ertugliflozin	omeprazole	omeprazole	1
Ertugliflozin	methylprednisolone	methylprednisolone	1
Ertugliflozin	candesartan	candesartan	1
Ertugliflozin	ertugliflozin	ertugliflozin	1
Ertugliflozin	admelog	insulin lispro	1
Ertugliflozin	hydrochlorothiazide\losartan potassium	hydrochlorothiazide\losartan potassium	1
Ertugliflozin	omeprazole 20 mg 1 cap by mouth daily	omeprazole 20 mg 1 cap by mouth daily	1
Ertugliflozin	metformin hcl 1000 mg 1 tablet by mouth twice per day	metformin hcl 1000 mg 1 tablet by mouth twice per day	1
Ertugliflozin	letrozole 2.5 mg 1 tablet by mouth every day	letrozole 2.5 mg 1 tablet by mouth every day	1
Ertugliflozin	lisinopril 10 mg tablet 1 tablet by mouth daily	lisinopril 10 mg tablet 1 tablet by mouth daily	1
Ertugliflozin	alprazolam 0.5 mg tablet 1 tablet orally twice per day prn anxiety	alprazolam 0.5 mg tablet 1 tablet orally twice per day prn anxiety	1
Ertugliflozin	calcium-vitamin d 600-400 mg unit tablet 1 tablet with a meal orally	calcium-vitamin d 600-400 mg unit tablet 1 tablet with a meal orally	1
Ertugliflozin	basaglar kwikpen 100 unit/ml solution pen-injector 60 units subq daily	basaglar kwikpen 100 unit/ml solution pen-injector 60 units subq daily	1
Ertugliflozin	epalrestat	epalrestat	1
Ertugliflozin	allisartan isoproxil	allisartan isoproxil	1
Ertugliflozin	esomeprazole	esomeprazole	1
Ertugliflozin	mosapride citrate	mosapride citrate	1
Ertugliflozin	famotidine	famotidine	1
Ertugliflozin	alogliptin	alogliptin	1
Ertugliflozin	herbals\panax notoginseng root extract	herbals\panax notoginseng root extract	1
Ertugliflozin	pioglitazone and metformin	metformin hydrochloride\pioglitazone hydrochloride	1
Ertugliflozin	beinaglutide	beinaglutide	1
Ertugliflozin	metformin hydrochloride;pioglitazone hydrochloride	metformin hydrochloride;pioglitazone hydrochloride	1
Ertugliflozin	methylcobalamin	methylcobalamin	1
Ertugliflozin	isosorbide mononitrate	isosorbide mononitrate	1
Ertugliflozin	irbesartan	irbesartan	1
Ertugliflozin	pitavastatin calcium	pitavastatin calcium	1
Ertugliflozin	thioctic acid	thioctic acid	1
Ertugliflozin	herbals\diammonium glycyrrhizinate	herbals\diammonium glycyrrhizinate	1
Ertugliflozin	phospholipid	phospholipid	1
Ertugliflozin	mirtazapine	mirtazapine	1
Ertugliflozin	lercanidipine hydrochloride	lercanidipine hydrochloride	1
Ertugliflozin	irbesartan and hydrochlorothiazide	hydrochlorothiazide\irbesartan	1
Ertugliflozin	kallidinogenase	kallidinogenase	1
Ertugliflozin	enoxaparin sodium	enoxaparin sodium	1
Ertugliflozin	naloxone hydrochloride\oxycodone hydrochloride	naloxone hydrochloride\oxycodone hydrochloride	1
Ertugliflozin	metamizole	metamizole	1
Ertugliflozin	alogliptin benzoate	alogliptin benzoate	1
Ertugliflozin	nifedipine	nifedipine	1
Ertugliflozin	ezetimibe	ezetimibe	1
Ertugliflozin	diltiazem hydrochloride	diltiazem hydrochloride	1
Ertugliflozin	tenormin	atenolol	1
Ertugliflozin	captopril	captopril	1
Ertugliflozin	glyburide	glyburide	1
Ertugliflozin	methenamine	methenamine	1
Ertugliflozin	potassium	potassium	1
Ertugliflozin	atenolol	atenolol	1
Ertugliflozin	omega-3-acid ethyl esters	omega-3-acid ethyl esters	1
Ertugliflozin	ezetimibe\rosuvastatin calcium	ezetimibe\rosuvastatin calcium	1
Ertugliflozin	ryzodeg 70/30	insulin aspart\insulin degludec	1
Ertugliflozin	insulinum	insulinum	1
Ertugliflozin	levetiracetam	levetiracetam	1
Ertugliflozin	bisoprolol fumarate\hydrochlorothiazide	bisoprolol fumarate\hydrochlorothiazide	1
Ertugliflozin	zofenopril	zofenopril	1
Ertugliflozin	chlorothiazide	chlorothiazide	1
Ertugliflozin	dobutamine	dobutamine hydrochloride	1
Ertugliflozin	oxygen	oxygen	1
Ertugliflozin	gaviscon	aluminum hydroxide\magnesium carbonate	1
Ertugliflozin	senna	sennosides	1
Ertugliflozin	latanoprost	latanoprost	1
Ertugliflozin	fexofenadine	fexofenadine hydrochloride	1
Ertugliflozin	dorzagliatin	dorzagliatin	1
Ertugliflozin	losartan potassium	losartan potassium	1
Ertugliflozin	vildagliptin	vildagliptin	1
Ertugliflozin	wavesense jazz	wavesense jazz	1
Ertugliflozin	pioglitazone	pioglitazone	1
Ertugliflozin	ranitidine hydrochloride	ranitidine hydrochloride	1
Ertugliflozin	bendroflumethiazide	bendroflumethiazide	1
Ertugliflozin	ferrous sulfate	ferrous sulfate	1
